# Supplementary material
Source: PubMed Central journal article supplement (PMC5372766)
Supplement: Supp_Fig2.pdf [file Supp_Fig2.pdf]

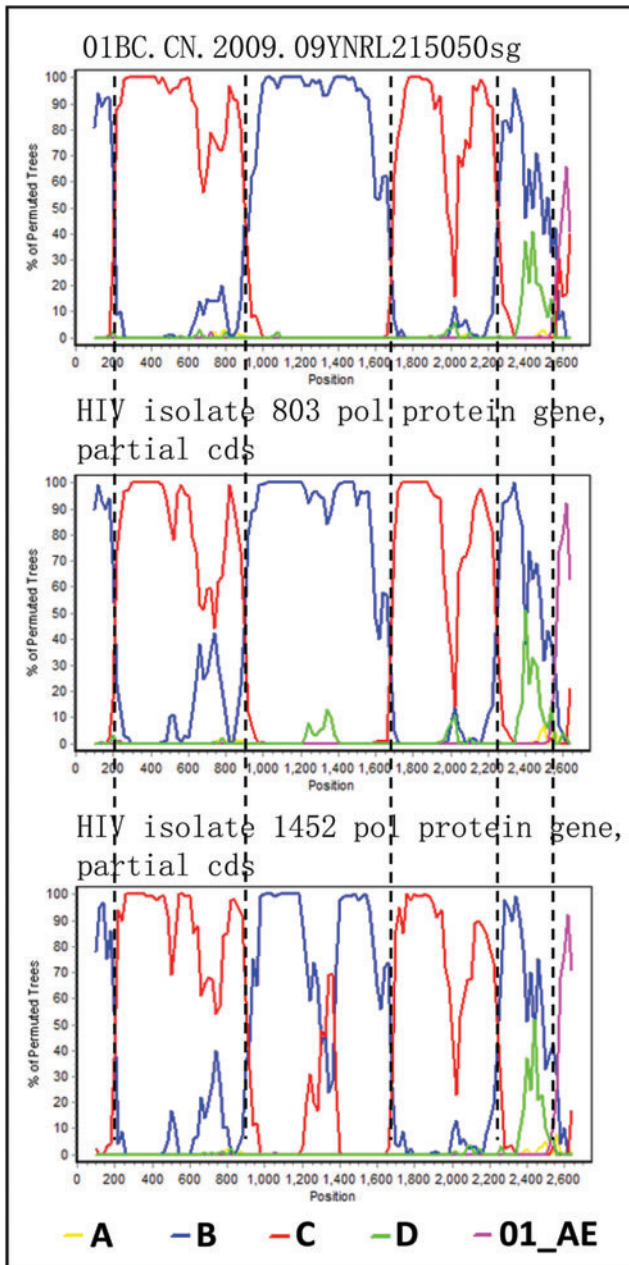

**SUPPLEMENTARY FIG. S2. Bootscan analyses of two *pol* sequences hit to the CRF87\_cpx strains.** The *pol* sequences of HIV isolates 803 and 1452 sequences share identical breakpoints with the CRF87\_cpx strains 01BC.CN.2012.DH32, 01BC.CN.2009.09YNLC497sg and 01BC.CN.2009.09YNLC215050sg.
