# Supplementary material
Source: PubMed Central journal article supplement (PMC5372766)
Supplement: Supp_Fig3.pdf [file Supp_Fig3.pdf]

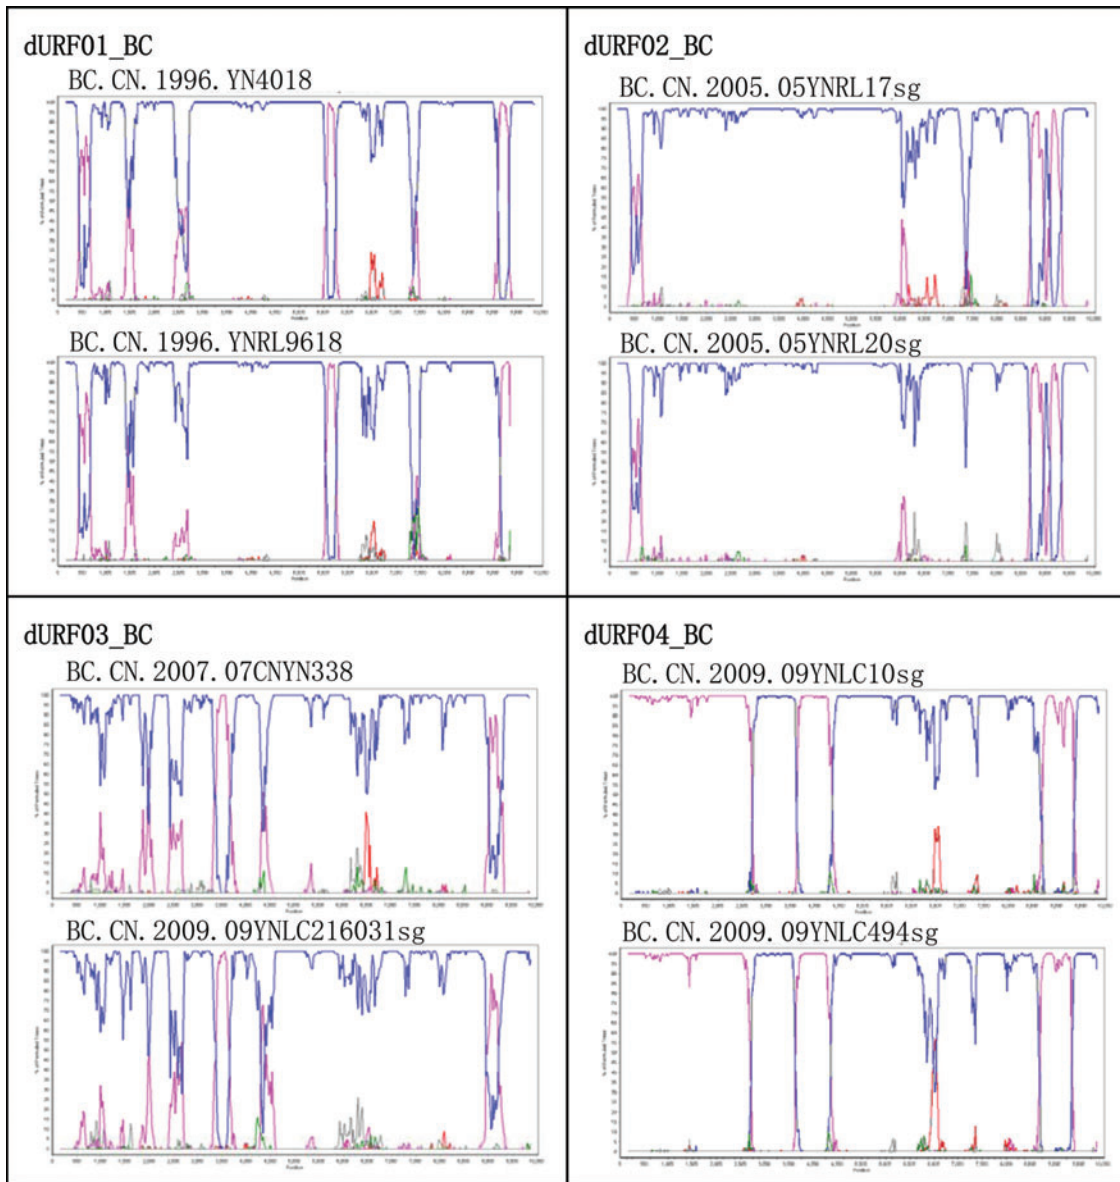

**SUPPLEMENTARY FIG. S3. Bootscan analyses of seven dominant URFs (dURFs) defined in this study.** The dURF implies that there are two URFs sharing identical same mosaic patterns. See Figure 1 for other details.

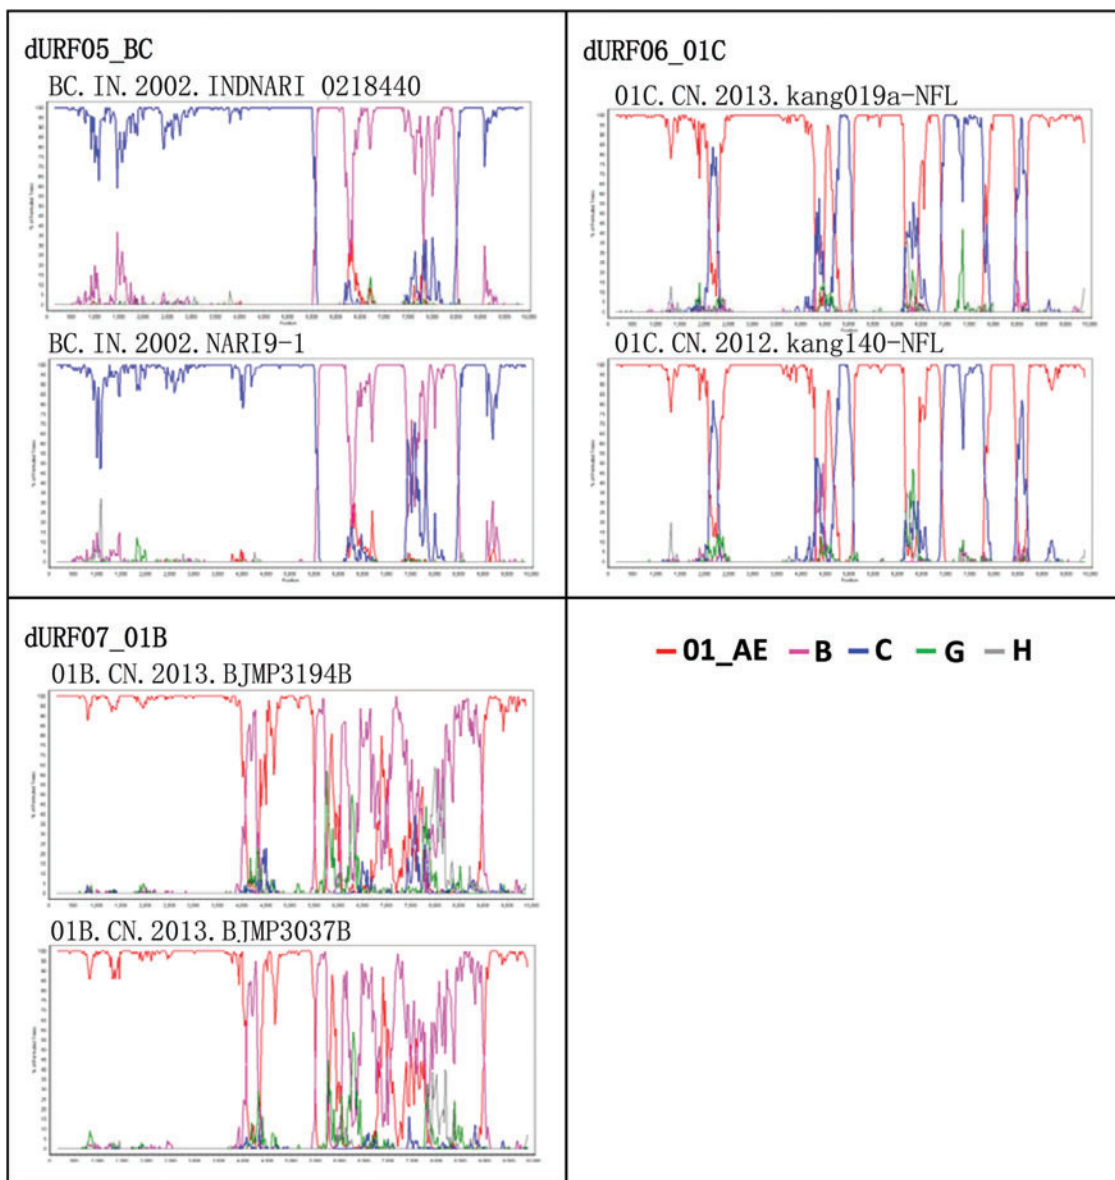

**SUPPLEMENTARY FIG. S3.** (continued)
