# Supplementary material
Source: PubMed Central journal article supplement (PMC5372766)
Supplement: Supp_Table1.pdf [file Supp_Table1.pdf]

SUPPLEMENTARY TABLE S1. NFLG SEQUENCES OF HIV-1 UNIQUE RECOMBINANT FORMS FROM ASIA

| <i>Accession number</i> | <i>Sequence name</i> | <i>Subtype</i> | <i>Location</i> | <i>Year</i> |
|-------------------------|----------------------|----------------|-----------------|-------------|
| KT438782                | 08MYKL056            | –              | MY              | 2008        |
| KT438783                | 10MYKJ086            | –              | MY              | 2010        |
| KT438784                | 10MYPR70             | –              | MY              | 2010        |
| FJ238521                | 07JSNJ001            | 107            | CN              | 2007        |
| KC990127                | JL070032             | 107            | CN              | 2007        |
| KC833436                | MSM0720              | 107            | CN              | 2007        |
| KJ184176                | JL.RF03              | 107            | CN              | 2010        |
| KJ184180                | JL.RF09              | 107            | CN              | 2011        |
| KJ778897                | kang124-NFL          | 107            | CN              | 2012        |
| KM982719                | BJMP3002             | 107            | CN              | 2013        |
| KM974720                | BJMP3026             | 107            | CN              | 2013        |
| KF541292                | GXDY_1299_NLFG       | 108            | CN              | 2012        |
| AB097872                | mCSW105              | 01A1           | MM              | 1999        |
| KF835546                | 07CNYN370            | 01B            | CN              | 2007        |
| KF011495                | GX070051             | 01B            | CN              | 2007        |
| KF859773                | JL.RF07              | 01B            | CN              | 2010        |
| KM111555                | JS2011001            | 01B            | CN              | 2011        |
| KP418805                | BJMP3037B            | 01B            | CN              | 2013        |
| KP418806                | BJMP3194B            | 01B            | CN              | 2013        |
| AB097867                | mCSW104              | 01B            | MM              | 1999        |
| AB097865                | mIDU502              | 01B            | MM              | 2000        |
| DQ366665                | 04MYKL019_1          | 01B            | MY              | 2004        |
| DQ366666                | 05MYKL043_1          | 01B            | MY              | 2005        |
| EF495062                | 06MMYKLD46           | 01B            | MY              | 2006        |
| EU031913                | 07MYKLD47            | 01B            | MY              | 2007        |
| EU031914                | 07MYKLD48            | 01B            | MY              | 2007        |
| KJ206289                | 10MYPR226            | 01B            | MY              | 2010        |
| KF835517                | 07CNYN330            | 01BC           | CN              | 2007        |
| KF835520                | 07CNYN334            | 01BC           | CN              | 2007        |
| KF835537                | 07CNYN358            | 01BC           | CN              | 2007        |
| KC898992                | 09YNLC497_sg         | 01BC           | CN              | 2009        |
| KC899012                | 09YNRL215050_sg      | 01BC           | CN              | 2009        |
| KF250395                | DH02                 | 01BC           | CN              | 2010        |
| KF250398                | DH07                 | 01BC           | CN              | 2010        |
| KF850149                | JL.RF01              | 01BC           | CN              | 2010        |
| KJ184177                | JL.RF05              | 01BC           | CN              | 2010        |
| KC183774                | ANHUI_BB17           | 01BC           | CN              | 2011        |
| KC183781                | ANHUI_WH69           | 01BC           | CN              | 2011        |
| KF250407                | DH28                 | 01BC           | CN              | 2012        |
| KF250408                | DH32                 | 01BC           | CN              | 2012        |
| KP170487                | S15-5 h4-3 h2-FL     | 01BC           | CN              | 2013        |
| KP668994                | BJ.2014.MSM.SP01     | 01BC           | CN              | 2014        |
| AB097868                | mIDU107              | 01BC           | MM              | 1999        |
| AB097866                | mCSW503              | 01BC           | MM              | 2000        |
| HM138656                | 08YN080              | 01C            | CN              | 2008        |
| KF250401                | DH18                 | 01C            | CN              | 2010        |
| KJ778896                | kang140-NFL          | 01C            | CN              | 2012        |
| KJ778895                | kang019a-NFL         | 01C            | CN              | 2013        |
| KT175204                | NARI-FLS_VB5         | 01C            | IN              | 1998        |
| KT074935                | NARI-FLS_YCM-151     | 01C            | IN              | 2014        |
| AP005206                | HH069                | 708            | CN              | 2000        |
| AP005207                | HH086                | 708            | CN              | 2000        |
| HQ225812                | 09YN072              | 708            | CN              | 2008        |
| DQ366660                | 05MYKL015_2          | 33_01B         | MY              | 2005        |
| DQ366661                | 05MYKL031_1          | 33_01B         | MY              | 2005        |
| GQ175881                | 07MYKT014            | 48_01B         | MY              | 2007        |
| GQ175882                | 07MYKT016            | 48_01B         | MY              | 2007        |
| GQ175883                | 07MYKT021            | 48_01B         | MY              | 2007        |
| KJ485698                | 09MYKL050            | 51_01B         | MY              | 2009        |
| KJ485697                | 11MYKL055            | 51_01B         | MY              | 2011        |
| DQ366664                | 03MYKL018_1          | 52_01B         | MY              | 2003        |
| DQ366663                | 04MYKL016_1          | 53_01B         | MY              | 2004        |

(continued)

SUPPLEMENTARY TABLE S1. (CONTINUED)

| <i>Accession number</i> | <i>Sequence name</i> | <i>Subtype</i> | <i>Location</i> | <i>Year</i> |
|-------------------------|----------------------|----------------|-----------------|-------------|
| JX390611                | 10MYKJ079            | 53_01B         | MY              | 2010        |
| JX390610                | 11FIR164             | 53_01B         | MY              | 2011        |
| EU031915                | 07MYKLD49            | 54_01B         | MY              | 2007        |
| JX390977                | 08MYKL044            | 54_01B         | MY              | 2008        |
| JX390976                | 09MYSB023            | 54_01B         | MY              | 2009        |
| JF340054                | 08CYM047             | 55_01B         | CN              | 2008        |
| JX574661                | HNCS102056           | 55_01B         | CN              | 2010        |
| KF927151                | 11CN.GDDG325         | 55_01B         | CN              | 2011        |
| KF927150                | 11HNCS500434         | 55_01B         | CN              | 2011        |
| KC183777                | ANHUI_FY64           | 55_01B         | CN              | 2011        |
| JX574663                | GDDG095              | 55_01B         | CN              | 2011        |
| JX574662                | GDDG318              | 55_01B         | CN              | 2011        |
| KC899008                | 09YNLX19 sg          | 57_BC          | CN              | 2009        |
| KC914396                | 1439                 | 57_BC          | CN              | 2009        |
| KC870044                | YNFL37               | 57_BC          | CN              | 2009        |
| KF250400                | DH17                 | 57_BC          | CN              | 2010        |
| KC522035                | 10MYKJ036            | 58_01B         | MY              | 2010        |
| KC522034                | 11MY1EP794           | 58_01B         | MY              | 2011        |
| KC522033                | 11MY1RJ704           | 58_01B         | MY              | 2011        |
| KF011494                | GD070126             | 59_01B         | CN              | 2007        |
| JX960635                | 09LNA423             | 59_01B         | CN              | 2009        |
| KC462190                | 11LNSY300392         | 59_01B         | CN              | 2011        |
| KJ484435                | 12CN.YNKM200199      | 59_01B         | CN              | 2012        |
| KC990125                | FJ070004             | 61_BC          | CN              | 2007        |
| KC990126                | JL070009             | 61_BC          | CN              | 2007        |
| KC990124                | JL100010             | 61_BC          | CN              | 2010        |
| KC870034                | YNFL13               | 62_BC          | CN              | 2010        |
| KC870035                | YNFL15               | 62_BC          | CN              | 2010        |
| KC870037                | YNFL18               | 62_BC          | CN              | 2010        |
| KC870042                | YNFL31               | 64_BC          | CN              | 2009        |
| KC870043                | YNFL33               | 64_BC          | CN              | 2009        |
| KC870040                | YNFL22               | 64_BC          | CN              | 2010        |
| KC870030                | YNFL05               | 65_cpx         | CN              | 2009        |
| KC870028                | YNFL02               | 65_cpx         | CN              | 2010        |
| KC183778                | ANHUI_HF104          | 65_cpx         | CN              | 2011        |
| KC183779                | ANHUI_HF115          | 67_01B         | CN              | 2011        |
| KC183780                | ANHUI_MAS59          | 67_01B         | CN              | 2011        |
| KF758551                | JS2010001            | 68_01B         | CN              | 2010        |
| KC183782                | ANHUI_WH73           | 68_01B         | CN              | 2011        |
| KC183783                | ANHUI_XC46           | 68_01B         | CN              | 2011        |
| KR019770                | 10MYKJ052            | 74_01B         | MY              | 2010        |
| KR019771                | 10MYPR268            | 74_01B         | MY              | 2010        |
| KR019772                | 11MYPR416            | 74_01B         | MY              | 2011        |
| KT152840                | NARI-FLS_VB6         | A1             | IN              | 1997        |
| KT152841                | NARI-FLS_VB11        | A1             | IN              | 1999        |
| KT152839                | NARI-FLS_IVC19-1     | A1             | IN              | 2009        |
| AF067156                | 95IN21301            | A1C            | IN              | 1995        |
| KT175206                | NARI-FLS_VB27-11     | A1C            | IN              | 1999        |
| DQ083238                | 1579A                | A1C            | IN              | 2001        |
| KT175202                | NARI-FLS_IVC3-1.28   | A1C            | IN              | 2006        |
| KC911635                | NARI-FLS_09-387      | A1C            | IN              | 2009        |
| KF250379                | YN4007               | C              | CN              | 1996        |
| KF250380                | YN4018               | BC             | CN              | 1996        |
| AY967804                | YNRL9607             | BC             | CN              | 1996        |
| AY967803                | YNRL9613             | BC             | CN              | 1996        |
| AY967807                | YNRL9618             | BC             | CN              | 1996        |
| AY967805                | YNRL9828             | BC             | CN              | 1998        |
| KC898975                | 05YNRL07 sg          | BC             | CN              | 2005        |
| KC898976                | 05YNRL08 sg          | BC             | CN              | 2005        |
| KC898977                | 05YNRL09 sg          | BC             | CN              | 2005        |
| KC899006                | 05YNRL17 sg          | BC             | CN              | 2005        |
| KC898978                | 05YNRL20 sg          | BC             | CN              | 2005        |

(continued)

SUPPLEMENTARY TABLE S1. (CONTINUED)

| <i>Accession number</i> | <i>Sequence name</i> | <i>Subtype</i> | <i>Location</i> | <i>Year</i> |
|-------------------------|----------------------|----------------|-----------------|-------------|
| KC898979                | 05YNRL25 sg          | BC             | CN              | 2005        |
| KC898981                | 06YNRL106 sg         | BC             | CN              | 2006        |
| KF835521                | 07CNYN335            | BC             | CN              | 2007        |
| KF835524                | 07CNYN338            | BC             | CN              | 2007        |
| KF835525                | 07CNYN339            | BC             | CN              | 2007        |
| KF835526                | 07CNYN340            | BC             | CN              | 2007        |
| KF835539                | 07CNYN360            | BC             | CN              | 2007        |
| KF835540                | 07CNYN361            | BC             | CN              | 2007        |
| KF835544                | 07CNYN367            | BC             | CN              | 2007        |
| KC898982                | 07YNLC08 sg          | BC             | CN              | 2007        |
| KC898983                | 07YNLC18 sg          | BC             | CN              | 2007        |
| KC899007                | 07YNLC22 sg          | BC             | CN              | 2007        |
| HM776938                | 309                  | BC             | CN              | 2007        |
| KF250381                | cq070084             | BC             | CN              | 2007        |
| KF250382                | gd070112             | BC             | CN              | 2007        |
| KF250383                | gx070056             | BC             | CN              | 2007        |
| KF250384                | jx070017             | BC             | CN              | 2007        |
| GU362013                | 08YN065              | BC             | CN              | 2008        |
| KC898984                | 09YNLC10 sg          | BC             | CN              | 2009        |
| KC898985                | 09YNLC216002 sg      | BC             | CN              | 2009        |
| KC898986                | 09YNLC216027 sg      | BC             | CN              | 2009        |
| KC898987                | 09YNLC216031 sg      | BC             | CN              | 2009        |
| KC898988                | 09YNLC216036 sg      | BC             | CN              | 2009        |
| KC898989                | 09YNLC492 sg         | BC             | CN              | 2009        |
| KC898990                | 09YNLC494 sg         | BC             | CN              | 2009        |
| KC898991                | 09YNLC496 sg         | BC             | CN              | 2009        |
| KC898993                | 09YNLC499 sg         | BC             | CN              | 2009        |
| KC898994                | 09YNLX047 sg         | BC             | CN              | 2009        |
| KC899009                | 09YNLX219037 sg      | BC             | CN              | 2009        |
| KC899010                | 09YNRL215025 sg      | BC             | CN              | 2009        |
| KC899013                | 09YNYJ217010 sg      | BC             | CN              | 2009        |
| KC899014                | 09YNYJ217016 sg      | BC             | CN              | 2009        |
| KC899015                | 09YNYJ479 sg         | BC             | CN              | 2009        |
| KF250402                | DH19                 | BC             | CN              | 2009        |
| KC870031                | YNFL08               | BC             | CN              | 2009        |
| KF250397                | DH04                 | BC             | CN              | 2010        |
| KF250399                | DH15                 | BC             | CN              | 2010        |
| KF011493                | JL100091             | BC             | CN              | 2010        |
| KF250405                | DH23                 | BC             | CN              | 2012        |
| KF250406                | DH24                 | BC             | CN              | 2012        |
| KF250409                | DH33                 | BC             | CN              | 2012        |
| KF250410                | DH36                 | BC             | CN              | 2012        |
| EU000515                | NARI10-1             | BC             | IN              | 1999        |
| EU000514                | INDNARI_0218440      | BC             | IN              | 2002        |
| EU000509                | NARI7-1              | BC             | IN              | 2002        |
| EU000506                | NARI9-1              | BC             | IN              | 2002        |
| AB097873                | mIDU103              | BC             | MM              | 1999        |
| AB097869                | mIDU106              | BC             | MM              | 1999        |

MY, Malaysia; CN, China; MM, Myanmar; IN, India; NFLG, near full-length genome.
